# Supplementary material for: Postoperative Proton Beam Therapy for Intracranial Mesenchymal Tumors: Clinical Outcomes and Literature Review
Source: Research Square preprint supplement (doi:10.21203/rs.3.rs-7143592/v1), 2025-09-01
Supplement: Supplementary file 1 [file 0c47d1ef3c2498b7e4c5d3b6.xlsx]

## Sheet: Sheet1
Patient ID	Name(论文发表时删除)	Sex	Age (at PBT start)	Final Pathology	Primary / Recurrent	Grade	Location	Surgical Resection Status	Prior RT Details (CTV/GTV, Total Dose, Fractionation)	PBT Target Volumes (CTV/GTV) & Doses (Total Dose, Fractionation)	PBT Organs at Risk (OARs) Dose Limits	Chemotherapy (Timing relative to PBT)	Pre-PBT Imaging (Tumor Residual)	Side Effects during PBT	PBT Start Date	Last Follow-up Date	Follow-up Duration (months)	Survival Status	Local Control Status
1	Cao Shuangli	Female	43	BCOR gene-altered Sarcoma	Recurrent	FNCLCC Grade G3	Initial: Left frontal-parietal; Recurrence/Metastasis (for PBT): Right occipital, multiple other intracranial. Later: Spinal, Lung.	Gross Total	Brain lesion, 35Gy in 5 fractions (7Gy/fx)	GTV1 60Gy/20fx (3Gy/fx), CTV1 50Gy/20fx (2.5Gy/fx).	Brainstem Dmax < 54Gy (varied per course), Lens Dmax < 8Gy, Optic nerve/chiasm Dmax < 40-50Gy.	Before and Concurrent	Yes (tumor recurrence)	Nausea, vomiting, dizziness, headache, skin reactions (Grade 1)	2024-11-07	2025-06-10	7.2	Alive	Yes (Stable Disease)
2	Li Xinyu	Female	24	Malignant tumor of mesenchymal origin, consider primary intracranial sarcoma with DICER1 mutation	Primary	High-grade features (Ki-67 ~80%)	Cerebellum (involving fourth ventricle, cerebellar vermis)	Partial	N/A	GTVp 66Gy/33fx (2Gy/fx), CTV 60.06Gy/33fx (1.82Gy/fx).	(Attempt 1) Brainstem Dmax < 56Gy, Spinal Cord Dmax < 45Gy, Optic Nerve/Chiasm Dmax < 54Gy.	No	Yes (postoperative residual tumor)	Nausea, vomiting, dizziness, headache, severe bone marrow suppression, fever, brain hemorrhage (led to PBT stop)	2024-11-07	2025-01-11	2.2	Dead (intracranial hemorrhage)	No
3	Yao Yuan	Female	34	Solitary Fibrous Tumor, Grade 3 (previously Anaplastic Hemangiopericytoma)	Recurrent	WHO Grade III / Grade 3	Left orbital-middle cranial fossa (intracranial-orbital communicating)	Subtotal	Multiple courses; e.g., GK: 11Gy/50% iso, 13Gy/45% iso, 14Gy/50% iso. X-Knife: Dose not specified.	CTV 54Gy/27fx (2Gy/fx); GTVtb boost 4Gy/2fx (2Gy/fx).	(Cumulative) Brainstem Dmax < 54Gy, Left Eye Dmax < 52Gy, Optic Chiasm Dmax < 42Gy, Left Cochlea Dmax < 52Gy.	Concurrent (ongoing targeted therapy)	Yes (probable tumor recurrence/residual)	Skin reaction (Grade 1), hair loss (slight), nasal congestion, runny nose, dry eyes	2024-11-15	2025-06-10	6.9	Alive	Yes (Stable Disease)
4	Chen Zhining	Female	4	ATXN1-DUX4 fusion CNS sarcoma / Malignant mesenchymal tumor	Recurrent	High-grade malignant tumor	Left frontal-parietal lobe	Gross Total	N/A	CTV1 (Tumor Bed) 59.4Gy/33fx (1.8Gy/fx); CTV2 (Boost) 3.6Gy/2fx (1.8Gy/fx).	Brainstem Dmax < 55Gy, Spinal Cord Dmax < 45Gy, Optic Nerve/Chiasm Dmax < 55Gy, Lens Dmax < 9Gy.	Before and Concurrent	No	Fever, nausea, acid reflux, bone marrow suppression (Grade 3), skin reaction (Grade 1)	2025-02-02	2025-06-10	4.3	Alive	Yes (Stable Disease)
5	Jiang Meifan	Female	6	CIC-rearranged sarcoma	Recurrent (suspected)	WHO Grade 4	Parietal lobe	Gross Total	N/A	CTVnew (tumor bed area) 59.4Gy/33fx (1.8Gy/fx).	Brainstem Dmax < 54Gy, Lens Dmax < 8Gy, Optic Nerve/Chiasm Dmax < 54Gy.	No (family refused concurrent)	No	Hair loss, skin reaction (pigmentation, local pain/soreness), sore throat (mild)	2024-09-23	2025-06-10	8.7	Alive	Yes (Stable Disease)
6	Wang Zhi	Male	14	Non-meningothelial mesenchymal malignant tumor (Recurrence dx. Initial: Anaplastic Meningioma)	Recurrent	Malignant (Ki67 60%+ for recurrent). Initial: WHO GIII.	Right frontal lobe	Subtotal	PTV planned 60Gy/30fx; Delivered 38Gy/19fx (paused due to recurrence).	CTV (Tumor bed/residual) 39.6Gy/22fx (1.8Gy/fx).	Skin Dmax 39.22Gy, Temporal Lobe Dmax 40.27Gy (limited data).	No	Yes (postoperative changes with linear enhancement; history of rapid recurrence)	Nausea, loss of appetite, cough with sputum	2023-08-05	2025-06-10	22.5	Alive	Yes (Stable Disease)
7	Su Yan	Male	14	Gliosarcoma	Primary	WHO Grade IV	Left frontal lobe	Subtotal	N/A	Adaptive plan. Initial: GTVtb 66Gy/30fx (2.2Gy/fx), CTV1 60Gy/30fx (2Gy/fx), CTV2 54Gy/30fx (1.8Gy/fx)	(Overall) Brainstem Max < 49Gy, Optic Chiasm Max < 52Gy, Left Optic Nerve Max < 33Gy, Left Lens Max < 4Gy.	Concurrent	Yes (tumor residual disease)	Hair loss (thinning), skin reaction (pigmentation). Tolerated well overall.	2023-08-11	2025-06-10	22.3	Dead	No (Local Progression)
8	Zhang Yixuan	Male	9	Angiomatoid fibrous histiocytoma	Recurrent / Disseminated	High-grade (implied)	Multiple sites (Right frontal, pineal, cerebellar vermis, other intracranial, spinal C3, C7)	Subtotal	N/A	CSI: PTV 36Gy/20fx (1.8Gy/fx). Boosts: PGTVtb1/2/3 (intracranial) 23.4Gy/13fx (1.8Gy/fx); PTV-C3/C7 (spinal) 7.2Gy/4fx (1.8Gy/fx).	(Cumulative) Brainstem MAX 54.18Gy, Spinal Cord MAX 44.04Gy, Right Optic Nerve MAX 50.69Gy, Left Eye MAX 35.42Gy.	Before	Yes (recurrent and metastatic disease)	Dizziness, sore throat, cough with sputum, skin reaction (rash/pimples), bone marrow suppression (Grade 2)	2023-12-05	2025-06-10	18.4	Alive	Yes (Stable Disease)
9	Weng Ziheng	Male	6	INI-1 deficient intracranial malignant mesenchymal tumor	Primary	High-grade (implied by INI-1 loss)	Temporal lobe (right)	Subtotal	N/A	GTV 60Gy/20fx (3.0Gy/fx), CTV2 54Gy/20fx (2.7Gy/fx), CTV1 50Gy/20fx (2.5Gy/fx).	Optic Nerve ≤ 42Gy, Lens ≤ 10Gy, Cochlea ≤ 32Gy, Brainstem ≤ 44Gy.	No	Yes (tumor residual	Nausea, dizziness, headache, skin rash (transient)	2023-06-14	2025-06-10	24.2	Alive	Recurrent
